# Supplementary material for: Sensitivity and specificity of an electronic nose in diagnosing pulmonary tuberculosis among patients with suspected tuberculosis
Source: PLoS One. 2019 Jun 13;14(6):e0217963. doi: 10.1371/journal.pone.0217963 (PMC6563983; doi:10.1371/journal.pone.0217963)
Supplement: S1 Appendix — (XLS) [file pone.0217963.s001.xls]

## Sheet: enose data
Patient Code	cough (1=no, 2=yes)	weight Loss (1=no, 2=yes)	night Sweat (1=no, 2=yes)	sputum Smear (1=negative, 2=positive AFB)	culture (1=negative, 2=positive MTB, 3=NTM)	Xray (1=normal, 2=suspect TB, 3=TB possible, 4=abnormal, but no TB)	Follow Up (1=not suggested TB, 2=suggested TB or response to TB treatment)	Calibration or Validation group (1=Calibration, 2=Validation)	Age	Sex (1=male, 2=female)	BMI	Diabetes (1=no, 2=yes)	HIV (1=no, 2=yes)	COPD (1=no, 2=yes)	Asthma (1=no, 2=yes)	Flu (1=no, 2=yes)	Use of Antibiotic (1=no, 2=yes)	Pause in Measurement (1=no, 2=yes)	Stress Status (1=no, 2=yes)	Smoking History (0=never, 1=yes<8 hours ago, 2=yes>8-24 hours ago, 3=yes, 1-14 days ago, 4=no >14 days -<1 year ago, 5=no>1 year)	Alcohol (0=never, 1=yes<8 hours ago, 2=yes>8-24 hours ago, 3=yes, 1-14 days ago, 4=no >14 days -<1 year ago, 5=no>1 year)	Food <8h prior to the test (1=fasting, 2=fed)	Drink <8h prior to the test (1=none or water, 2=others)	FINAL CLASSIFICATION (0=no TB or healthy controls, 1=probably no TB, 2=probably active TB, 3= active TB)	FINAL CLASSIFICATION RECODE (0=no TB, 1=TB)	Breath Test (1=neg, 2=pos)	Breath Test Value	Diagnosis of patients	Food <8h prior to the test	Drink <8h prior to the test
A01	2	2	2	2	2	2	2	1	64	1	17.97	2	1	1	1	1	1	1	1	0	0	1	1	3	1	2	0.74	TB	none	water
A02	2	2	2	2	2	2	2	1	58	1	17.91	1	1	1	1	2	1	1	1	0	0	2	1	3	1	2	0.55	TB	porridge	water
A03	2	2	2	2	2	2	2	1	27	1	17.26	1	1	1	1	1	1	1	1	0	0	2	2	3	1	2	0.9	TB	soto (vegetables, rice, chicken,curcuma)	sweetened tea
A04	2	2	2	2	2	2	2	1	26	1	19.72	1	1	1	1	1	1	1	1	0	0	2	2	3	1	2	0.8	TB	rice, vegetables, tempe	sweetened tea, water
A05	2	2	2	2	2	2	2	1	31	2	16.22	1	1	1	1	1	1	1	1	0	0	2	2	3	1	2	0.77	TB	rice, tempe, chicken	sweetened tea
A06	2	2	2	1	1	1	1	2	61	1	21.23	1	1	1	2	1	1	1	1	0	0	1	1	1	0	2	0.4	asthma	none	water
A07	2	2	2	1	1	1	1	2	70	1	21.16	1	1	1	1	1	1	1	1	1	0	1	1	1	0	2	0.02	chronic bronchitis	none	water
A08	2	2	2	2	2	2	2	1	22	2	17.8	1	1	1	1	1	1	1	1	0	0	2	1	3	1	2	0.77	TB	meat ball, noodle, vegetables	water
A09	2	2	2	2	1	2	2	2	24	2	17.31	1	1	1	1	1	1	1	1	0	0	2	1	2	1	2	0.94	TB	rice, vegetables soup	water
AA01	2	2	2	2	1	2	2	2	49	1	14.69	1	1	1	1	1	1	1	1	0	0	2	2	2	1	1	-0.08	TB	porridge	milk,water
AA02	2	1	1	2	1	2	2	2	30	2	20.08	1	1	1	1	2	1	1	1	0	0	2	2	2	1	2	0.21	TB	rice,vegetables,egg	milk,water
AA03	2	2	1	1	2	1	2	2	27	2	18.77	1	1	1	1	1	1	1	1	0	0	2	1	2	1	2	0.37	TB	rice,chicken nugget	water
AA04	2	1	1	1	3	2	1	2	41	1	30.09	1	1	1	1	2	1	1	1	0	0	2	2	1	0	1	-0.56	asthma	rice,gudeg(jackfruit,egg)	sweetened tea
AA06	2	2	1	1	1	1	1	2	65	2	22.31	1	1	1	1	1	1	1	1	0	0	2	1	1	0	1	-0.78	bronchiectasis	porridge,vegetables	water
AA07	2	2	1	1	1	2	1	2	30	1	20.52	1	1	1	1	1	1	1	1	0	0	1	1	1	0	1	-0.7	bacterial pneumonia	none	none
AA08	2	2	1	1	1	1	1	2	22	1	18	1	1	1	1	1	1	1	1	0	0	2	2	1	0	2	0.43	bacterial pneumonia	rice,catfish	sweetened tea
AA11	2	2	1	1	1	2	1	2	37	2	20.81	1	1	1	1	1	1	1	1	0	0	2	2	1	0	2	0.03	chronic bronchitis	rice,vegetables,chicken,tempe	sweetened tea
AA12	2	2	2	2	2	2	2	1	33	1	16.73	1	1	1	1	1	1	1	1	0	0	2	2	3	1	2	0.85	TB	rice,vegetables soup	sweetened tea
AA13	2	2	2	2	1	2	2	2	51	1	17.65	2	1	1	1	1	1	1	1	0	0	2	1	2	1	1	-0.84	TB	porridge, egg	water
AA14	2	2	2	2	1	2	2	2	46	1	17.24	1	1	1	1	1	1	1	1	0	0	2	2	2	1	2	0.37	TB	rice,vegetables	sweetened tea
AA15	2	2	2	2	2	2	2	1	33	1	18.59	1	1	1	1	1	1	1	1	0	0	2	2	3	1	2	0.67	TB	bread	sweetened tea
AA17	2	1	1	1	1	1	1	2	30	1	21.45	1	1	1	1	1	1	1	1	0	0	2	1	0	0	1	-0.01	chronic bronchitis	rice, beef	water
AA19	2	1	1	1	1	2	1	2	48	1	20.2	1	1	1	1	1	1	1	1	0	0	2	2	1	0	2	0.38	bacterial pneumonia	porridge	sweetened tea,water
AA20	2	1	1	1	1	1	1	1	54	1	22.23	1	1	1	1	1	1	1	1	0	0	2	2	0	0	1	-0.32	bacterial pneumonia	porridge,egg	sweetened tea,water
AA21	1	1	2	1	1	1	1	1	57	1	20.94	1	1	1	1	1	1	1	1	0	0	2	2	0	0	2	0.77	bacterial pneumonia	rice, egg	sweetened tea, water
AA22	2	1	1	1	1	1	1	1	25	1	20.76	1	1	1	1	1	1	1	1	0	0	2	1	0	0	2	0.88	chronic bronchitis	rice,chicken,vegetables	water
AA24	2	2	1	1	1	4	1	2	59	1	17.3	1	1	1	1	1	1	1	1	0	0	2	2	1	0	1	-0.05	chronic bronchitis	porridge, tofu	sweetened tea, water
AA26	2	1	1	1	2	1	1	2	29	2	24.09	1	1	1	2	1	1	1	1	0	0	2	2	1	0	1	-0.09	chronic bronchitis	rice, chicken	sweetened tea
AA27	2	2	2	2	2	2	2	1	23	2	15.56	1	1	1	1	1	1	1	1	0	0	2	1	3	1	2	0.01	TB	porridge,egg	water
AA28	2	2	2	2	1	2	2	2	55	1	14.34	2	1	1	1	1	1	1	1	0	0	2	2	2	1	1	-0.13	TB	porridge	sweetened tea
AA29	2	2	2	2	2	2	2	1	24	1	20.07	1	1	1	1	1	1	1	1	0	4	2	1	3	1	2	0.11	TB	rice,gudeg(jackfruit,egg)	water
AA30	1	1	2	1	1	4	1	1	33	2	20.7	1	1	1	1	1	1	1	1	0	0	2	1	0	0	1	-0.72	chronic bronchitis	rice,chicken,stir-fry vegetables	water
AA31	2	2	1	2	2	2	2	1	47	1	18.78	1	1	1	1	1	1	1	1	0	0	2	2	3	1	2	0.1	TB	porridge,egg	tea
AA32	2	1	1	1	2	2	1	2	23	1	18.07	1	1	1	1	1	1	1	1	0	0	2	1	1	0	1	-0.9	chronic bronchitis	rice, egg	water
AA33	2	2	1	2	1	2	2	2	20	2	17.07	1	1	1	1	1	1	1	1	0	0	2	1	2	1	2	0.22	TB	rice,fish,cassava leaf	water
AA34	2	2	2	2	2	2	2	1	54	1	21.56	1	1	1	1	1	1	1	1	0	0	2	2	3	1	2	0.97	TB	porridge	sweetened tea
AA36	2	2	2	2	1	2	1	2	42	1	17.72	1	1	1	1	1	1	1	1	0	0	2	2	1	0	2	0.13	pneumonia	porridge, egg	sweetened tea,water
AA37	2	1	1	1	2	1	2	2	29	1	18.96	1	1	1	1	1	1	1	1	0	0	2	2	2	1	1	-0.48	TB	rice, egg	sweetened tea
AA38	2	2	1	1	1	1	1	2	30	2	18.22	1	1	1	1	1	1	1	1	0	0	2	2	1	0	2	0.07	bronchiectasis	porridge, tofu	sweetened tea, water
AA41	2	2	2	2	2	3	2	1	34	2	19.23	1	1	1	1	1	1	1	1	0	0	2	2	3	1	2	0.9	TB	rice,chicken,vegetables	sweetened tea, water
AA42	2	2	2	2	2	2	2	1	30	1	17.85	1	1	1	1	1	1	1	1	3	4	2	2	3	1	1	-0.47	TB	bread	milk
AA43	2	2	2	2	2	2	2	1	30	1	19.03	1	1	1	1	1	1	1	1	4	0	2	1	3	1	2	0.77	TB	chicken,rice,vegetables	water
AA44	2	2	2	2	2	2	2	1	44	2	21.33	1	1	1	1	1	1	1	1	0	0	2	2	3	1	2	0.77	TB	porridge, tofu	sweetened tea, water
AA45	2	2	1	2	2	2	2	1	60	2	17.78	1	1	1	1	1	1	1	1	0	0	2	2	3	1	2	0.89	TB	vegetables	sweetened tea, water
AA47	2	2	2	2	2	2	2	1	64	1	21.88	2	1	1	1	1	1	1	1	0	0	2	2	3	1	1	-0.63	TB	porridge	sweetened tea
AA48	2	2	1	2	2	2	2	1	20	2	15.62	1	1	1	1	1	1	1	1	0	0	2	1	3	1	2	0.82	TB	fried rice, egg	water
AA49	2	2	1	1	1	1	1	2	55	1	19.33	1	1	1	1	1	1	1	1	3	0	2	2	1	0	1	-0.12	chronic bronchitis	porridge,egg	tea,water
AA50	2	2	1	1	1	4	1	2	63	2	20	1	1	1	1	1	1	1	1	0	0	2	2	1	0	2	0.12	bronchiectasis	egg, rice	tea,water
AA51	2	2	1	1	1	1	1	2	23	1	19.33	1	1	1	1	1	1	1	1	3	5	2	2	1	0	2	0.01	chronic bronchitis	porridge,tofu	sweetened tea, water
AA52	2	2	2	2	2	2	2	1	44	1	18.59	1	1	1	1	1	1	1	1	3	4	2	2	3	1	2	0.03	TB	rice,vegetables	coffee,water
AA54	2	2	1	2	2	3	2	1	26	2	17.58	1	1	1	1	1	1	1	1	0	0	2	2	3	1	2	0.11	TB	bread	milk, water
AA55	2	1	1	1	1	3	1	2	60	1	21.26	1	1	1	1	1	1	1	1	0	0	2	2	1	0	2	0.5	bacterial pneumonia	porridge, egg	sweetened tea, water
AA56	1	1	1	1	1	1	1	1	63	2	26.1	1	1	1	1	1	1	1	1	0	0	2	2	0	0	2	0.03	chronic bronchitis	porridge, tofu	sweetened tea, water
AA57	2	2	2	2	3	2	2	2	68	2	17.9	1	1	1	1	1	1	1	1	0	0	2	2	2	1	2	0.15	TB	bread	sweetened tea, water
AA58	2	2	1	1	3	4	1	2	75	1	20.07	1	1	1	1	1	1	1	1	1	0	2	2	1	0	1	-0.32	chronic bronchitis	porridge, spinach	sweetened tea, water, honey
AA59	2	2	1	2	3	4	2	2	70	1	12.89	1	1	1	1	1	1	1	2	1	0	2	2	2	1	2	0.26	TB	porridge, tempe, tofu	tea
AA60	2	1	1	1	1	1	1	1	63	1	22.41	1	1	1	1	1	1	1	1	5	0	2	1	0	0	1	-0.5	chronic bronchitis	rice,vegetables	water
AA61	2	1	1	1	1	1	1	1	40	2	19.92	1	1	1	1	1	2	1	2	0	0	2	2	0	0	1	-0.2	chronic bronchitis	rice,vegetables soup	sweetened tea
AA62	2	1	1	1	1	1	1	1	34	1	26.37	1	1	1	1	1	1	1	1	0	0	2	1	0	0	2	0.02	chronic bronchitis	rice, fish	water
AA63	2	1	1	1	1	1	1	1	40	2	19.56	1	1	1	1	1	1	1	1	0	0	2	1	0	0	2	0.02	chronic bronchitis	porridge, egg	water
AA66	2	1	1	1	1	1	1	1	61	1	18.42	1	1	1	1	1	1	1	1	5	0	1	1	0	0	2	0.08	asthma	none	none
AA67	2	2	2	2	2	2	2	1	61	2	24.89	1	1	1	1	1	2	1	1	0	0	2	2	3	1	1	-0.2	TB	rice,jackfruit,tofu,palm sugar	water,chlorofil
AA68	2	2	2	2	2	2	2	1	41	1	17.44	1	1	1	1	1	2	1	1	3	5	2	2	3	1	2	0.1	TB	porridge	milk, water
AA69	2	1	1	1	1	1	1	1	53	2	22.22	1	1	1	1	1	2	1	1	0	0	2	2	0	0	1	-0.32	chronic bronchitis	rice,fish,tempe	tea,water
AA70	2	1	1	1	1	1	1	1	31	1	27.18	1	1	1	1	1	1	1	1	0	0	1	1	0	0	1	-0.35	chronic bronchitis	none	water
AA71	2	1	1	1	1	1	1	1	50	1	18.07	1	1	1	1	1	1	1	1	0	0	2	2	0	0	2	0.15	bacterial pneumonia	rice,egg	water,sweetened tea
AA72	2	1	1	1	1	1	1	1	27	2	24.03	1	1	1	1	1	1	1	1	0	0	1	2	0	0	2	0.03	chronic bronchitis	none	lime juice
AA73	2	1	1	1	1	1	1	1	73	1	18.07	1	1	1	1	1	1	1	1	3	0	1	2	0	0	2	0.03	COPD	none	water, milk
AA74	2	2	2	2	2	2	2	1	20	1	17.43	1	1	1	1	1	1	1	1	3	0	2	2	3	1	2	0.02	TB	rice,carrot,chicken soto	water,sweetened tea
AA76	2	1	1	1	1	1	1	1	54	1	18.03	1	1	1	1	1	1	1	1	0	0	2	2	0	0	2	0.11	chronic bronchitis	rice,chicken,coconut milk	water,sweetened tea
AA77	2	2	2	2	2	2	2	1	24	2	17.07	1	1	1	2	1	1	1	1	0	0	2	1	3	1	2	0.06	TB	rice,tempe	water
AA79	2	1	1	1	1	1	1	1	31	1	23.11	1	1	1	1	1	1	1	1	3	4	2	2	0	0	1	-0.2	chronic bronchitis	rice,papaya leaves	milk,water
AA80	2	1	1	1	1	3	1	2	77	2	26.67	1	1	1	1	1	2	1	1	0	0	2	2	1	0	2	0.21	chronic bronchitis	rice,egg,tempe	water,sweetened tea
AA81	2	2	2	2	2	3	2	1	60	1	15.78	1	1	1	1	1	1	1	1	0	0	2	2	3	1	1	-0.32	TB	porridge,chicken	water,sweetened tea
AA82	2	1	1	1	1	1	1	1	48	2	29.3	1	1	1	1	1	1	1	1	0	0	2	2	0	0	2	0.14	bacterial pneumonia	soto,tempe	water,sweetened tea
AA83	2	2	1	1	1	1	1	2	60	1	20.03	1	1	1	2	1	1	1	1	0	0	2	2	1	0	1	-1	chronic bronchitis	rice,vegetables	water,sweetened tea
AA86	2	1	1	1	1	1	1	1	85	2	18.03	1	1	1	1	1	1	1	1	0	0	2	1	0	0	1	-0.77	bacterial pneumonia	porridge	water
AA87	2	2	1	1	2	2	1	2	30	2	18.61	1	1	1	1	1	1	1	1	0	0	2	2	2	1	1	-0.59	chronic bronchitis	banana	milk, water
AA89	2	2	1	2	1	2	2	2	77	1	15.79	2	1	1	1	1	1	1	1	5	0	2	2	2	1	1	-0.12	TB	rice,chicken,eggplant	sweetened tea
AA91	2	1	1	1	1	3	1	2	51	2	18.73	1	1	1	1	1	1	1	1	0	0	2	1	1	0	2	0.01	bacterial pneumonia	grapes	water
AA92	2	2	2	2	2	2	2	1	33	2	20.7	1	1	1	1	1	1	1	1	0	0	2	1	3	1	2	0.77	TB	rice, vegetables, chicken	mineral water
AA93	2	1	1	1	1	3	1	2	54	2	24.97	1	1	1	1	1	1	1	1	0	0	2	2	1	0	2	0.06	bacterial pneumonia, asthma	rice, stir tempe	hot tea
AA94	2	1	1	1	1	2	1	2	62	1	21.48	1	1	1	1	1	1	1	1	5	5	2	2	1	0	1	-0.3	chronic bronchitis	rice, egg	sweet tea
AA95	2	2	1	2	2	2	2	1	80	1	19.98	1	1	1	1	1	1	1	1	4	5	2	2	3	1	2	0.87	TB	rice, vegetables	mineral water, sweet tea
AA96	2	1	1	1	1	1	1	1	53	2	20.43	2	1	1	1	1	1	1	1	0	0	2	2	0	0	2	0.03	chronic bronchitis	porridge, vegetables	tea,mineral water
AA97	2	1	1	1	1	1	1	1	46	2	22.22	1	1	1	1	1	1	1	1	0	0	2	2	0	0	1	-0.53	Common cold, chronic bronchitis	egg	tea,mineral water
AA98	2	2	2	2	1	2	2	2	25	1	19.23	1	1	1	1	1	1	1	1	3	0	2	2	2	1	2	0.06	TB	meatball	tea
AA99	2	2	1	1	1	1	1	2	23	2	18.52	1	1	1	1	1	1	1	1	0	0	2	1	1	0	2	0.26	chronic bronchitis	fried rice and fried noddle	water
AA101	2	2	1	2	3	2	2	2	47	1	18.59	1	1	1	1	1	1	1	2	0	0	2	2	2	1	2	0.7	TB	rice, egg	tea with sugar
AA103	2	1	1	1	1	2	1	2	44	1	19.33	2	1	1	1	1	1	1	1	0	0	2	2	1	0	2	0.27	Common cold, chronic bronchitis	rice, soup, tofu	tea
AA104	2	1	1	1	1	1	1	1	61	2	25.81	1	1	1	1	1	1	1	1	0	0	2	2	0	0	1	-0.2	chronic bronchitis	rice, vegetables	tea, mineral water
AA105	2	2	1	1	1	1	1	2	23	1	22.84	1	1	1	1	1	1	1	1	3	0	2	2	1	0	1	-0.21	chronic bronchitis	rice, chicken, vegetable	tamarind ginger, mineral water
AA106	2	1	1	1	1	1	1	1	37	2	19.53	1	1	1	1	1	1	1	1	0	0	2	2	0	0	1	-1	chronic bronchitis	lemper (sticky rice)	tea
AA107	2	2	1	2	2	2	2	1	54	1	17.91	1	1	1	1	1	1	1	1	0	0	2	2	3	1	1	-0.2	TB	rice, egg	tea
AA108	2	2	2	2	3	2	2	2	18	1	16.85	1	1	1	1	1	1	1	1	0	0	2	2	2	1	1	-0.69	TB	krecek vegetable, rice	coffee, milk
AA109	2	2	2	2	2	2	2	1	24	1	15.43	1	1	1	1	1	1	1	1	3	0	1	1	3	1	2	0.03	TB	none	none
AA111	2	1	1	1	2	2	1	2	61	1	17.53	1	1	1	1	1	1	1	1	3	0	2	2	1	0	2	0.13	bacterial pneumonia	rice and side dish	tea
AA112	2	2	1	1	1	3	1	2	54	1	22.22	1	1	1	1	1	1	1	1	3	0	2	1	1	0	1	-0.43	bacterial pneumonia	sweet potato	mineral water
AA113	2	2	1	2	3	2	2	2	49	1	20.76	2	1	1	1	1	1	1	1	1	0	2	2	2	1	2	0.44	TB	rice and gudeg	tea, mineral water
AA115	2	1	1	1	1	1	1	1	39	1	24.22	1	1	1	1	1	1	1	1	0	0	2	1	0	0	2	0.02	asthma	banana	none
AA116	2	2	1	1	1	1	1	2	20	1	19.1	2	1	1	1	1	1	1	1	0	0	2	2	1	0	1	-0.19	chronic bronchitis	rice, tempe	honey, mineral water
AA118	2	1	1	1	1	1	1	1	56	1	19.15	1	1	1	1	1	1	1	1	0	0	2	1	0	0	1	-0.22	chronic bronchitis	rice, egg	water
AA120	2	1	2	1	2	2	2	1	33	1	16.53	1	1	1	1	1	1	1	1	1	0	1	2	2	1	2	0.1	TB smear negative	none	milk, mineral water
AA121	2	1	1	1	1	4	1	1	47	2	20.71	1	1	1	1	1	1	1	1	0	0	2	1	0	0	1	-0.32	chronic bronchitis	rice, chicken	mineral water
AA122	2	2	1	1	1	1	1	2	56	2	19.53	1	1	1	1	1	1	1	1	0	0	2	1	1	0	2	0.44	bronchiectasis	cake	mineral water
AA123	2	2	2	1	1	1	1	2	65	2	26.63	1	1	1	1	1	1	1	1	0	0	2	1	1	0	1	-0.05	chronic bronchitis	rice, vegetable	mineral water
AA124	2	2	1	1	2	2	2	2	56	1	15.57	1	1	1	1	1	1	1	1	0	0	2	1	2	1	2	0.25	TB	rice, egg	water
AA125	2	1	1	1	1	1	1	1	53	1	21.26	1	1	1	1	1	1	1	1	5	0	2	1	0	0	1	-0.35	chronic bronchitis	chicken porridge,egg	water
AA126	2	1	1	1	1	1	1	1	27	1	21.46	1	1	1	1	1	1	1	1	0	0	2	1	0	0	2	0.9	chronic bronchitis	rice, fried chicken	water
AA128	2	2	1	1	1	4	1	2	46	2	20.44	1	1	1	1	2	1	1	1	0	0	2	1	1	0	2	0.27	Common cold, chronic bronchitis	porridge, vegetables	mineral water
AA129	2	1	2	1	1	2	2	2	41	1	17.1	1	1	1	1	1	1	1	1	0	0	2	2	2	1	1	-0.47	TB	rice, fried tempe	milk
AA132	2	2	1	1	1	3	1	2	62	1	17.3	1	1	1	1	1	1	1	1	5	0	2	2	1	0	2	0.19	bacterial pneumonia	bread	sweet tea, mineral water
B01	2	2	2	2	2	2	2	1	50	1	18.34	2	1	1	1	1	1	1	1	4	0	2	1	3	1	2	1	TB	brocoly,squash,pumpkin,meat,carrot,tomat	water
B03	2	1	2	2	2	2	2	2	45	2	22.89	1	1	1	1	1	1	1	1	0	0	1	1	3	1	2	0	TB	none	none
B05	2	2	2	2	2	2	2	1	50	1	20.58	2	1	1	1	1	1	2	1	0	0	2	2	3	1	2	0.91	TB	lodeh,egg,liver,rice,papaya,donut,bean	water,milk
BB02	2	2	2	1	1	2	2	2	21	1	15.57	1	1	1	1	1	1	1	1	0	0	2	2	2	1	2	0.26	TB	bread	tea without sugar
BB06	2	1	1	1	1	4	1	2	51	2	23.73	1	1	1	1	1	2	1	1	0	0	2	2	0	0	2	0.11	chronic bronchitis	rice,jackfruit,palm sugar	tea, syrup
BB08	2	1	2	1	1	2	1	2	51	1	20.08	1	1	1	1	1	1	1	1	0	0	2	2	1	0	1	-0.11	fibrosis	rice,tempe,noodle	sweetened tea
BB10	2	1	1	1	1	1	1	1	45	2	20.69	1	1	1	1	1	2	1	1	0	0	2	2	0	0	2	0.11	chronic bronchitis	rice,vegetables,tempe	sweetened tea,water
BB13	1	2	2	2	1	2	2	2	43	1	18.16	1	2	1	1	1	1	1	1	0	0	2	1	2	1	1	-0.34	TB	rice,noodle	water
BB14	2	2	2	1	1	1	1	2	80	1	20.81	1	1	1	1	1	1	1	1	5	0	2	2	1	0	1	-0.62	chronic bronchitis	rice,tempe,spinach	milk
BB16	2	1	2	1	1	2	1	2	57	1	18.67	1	1	1	1	1	1	1	1	0	0	2	2	1	0	2	0.15	bacterial pneumonia	rice,vegetables,tofu	tea
BB17	2	2	2	1	1	1	1	2	60	1	18.36	1	1	1	1	1	1	1	1	0	0	2	1	1	0	1	-0.23	chronic bronchitis	rice,vegetables,coconut	water
BB19	2	1	1	1	1	1	1	1	53	2	24.03	1	1	1	1	1	1	1	1	0	0	2	1	0	0	2	0	chronic bronchitis	rice,spinach soup,salted egg	water
BB20	2	2	1	1	1	1	1	2	62	1	17.65	1	1	1	1	1	1	1	1	4	0	2	2	1	0	2	0.05	COPD, bronchiectasis	porridge	sweetened tea
BB22	2	1	2	1	1	4	1	2	63	1	16.61	1	1	1	1	1	2	1	1	5	0	2	1	1	0	1	-0.91	bronchiectasis	rice,tempe,beans	water
BB25	2	2	2	1	1	1	1	2	21	2	16.02	1	1	1	1	1	1	1	1	0	0	2	2	1	0	2	0.21	chronic bronchitis	porridge	tea
BB27	2	1	1	1	1	1	1	1	72	1	18.67	2	1	1	1	1	1	1	1	5	0	1	1	0	0	1	-0.2	chronic bronchitis	none	water
BB28	2	2	2	2	2	1	2	2	41	1	20.2	2	1	1	1	1	1	1	1	0	0	2	2	2	1	2	0.04	TB	rice,egg	tea
BB31	2	2	2	1	1	1	1	2	61	2	27.68	1	1	1	1	1	1	1	1	0	0	2	2	1	0	2	0.76	chronic bronchitis	rice,vegetables,coconut milk,chili	tea
BB33	2	2	2	1	1	4	1	2	55	2	18.31	1	1	1	1	1	1	1	1	0	0	2	2	1	0	1	-0.16	chronic bronchitis	porridge	tea,water
BB34	2	2	1	2	2	2	2	1	29	1	22.86	1	1	1	1	1	1	1	1	0	0	2	2	3	1	2	0.22	TB	flour,coconut milk,palm sugar	beans milk
BB35	2	1	2	1	1	1	1	2	61	1	21.3	1	1	1	1	1	1	1	1	0	0	2	2	1	0	1	-0.59	chronic bronchitis	porridge,spinach,coconut milk,rice	water,sweetened tea
BB36	2	1	2	2	2	2	2	1	36	1	22.23	1	1	1	1	1	1	1	1	4	0	2	2	3	1	1	-0.32	TB	rice,vegetables,egg	water,sweetened tea
BB40	2	1	1	1	1	4	1	1	51	1	22.31	1	1	1	1	1	1	1	1	4	0	2	2	0	0	2	0.03	chronic bronchitis	rice,egg,tofu	milk,water
BB42	2	2	2	1	1	1	1	2	58	1	16.65	2	1	1	1	1	1	1	1	0	0	2	2	1	0	1	-0.92	chronic bronchitis	rice, chicken	water, tea
BB44	2	2	2	2	2	2	2	1	63	1	15.57	2	1	1	1	1	1	1	1	0	0	2	2	3	1	1	-0.35	TB	porridge	water,milk
BB51	1	1	1	1	1	4	1	1	28	1	16.71	1	1	1	1	1	1	1	1	0	0	1	1	0	0	2	0.19	chronic bronchitis	none	none
BB52	2	1	1	1	1	4	1	1	22	2	18.73	1	1	1	1	1	1	1	1	0	0	1	1	0	0	1	-0.35	chronic bronchitis	none	none
BB53	2	1	2	2	2	2	2	1	31	2	19.9	1	1	1	1	1	1	1	1	0	0	2	2	3	1	2	0.18	TB	rice,bergedel (fried potato, meat)	sweetened tea
BB55	2	2	2	1	1	1	1	2	48	2	14.57	1	1	1	1	1	1	1	1	0	0	2	2	1	0	2	0.18	chronic bronchitis	rice,egg,vegetables,tofu	tea, water
BB56	2	1	1	1	1	1	1	1	33	1	20.42	1	1	1	1	1	1	1	1	0	0	2	1	0	0	2	0.06	chronic bronchitis	greenpeal,coconut milk	water
BB57	2	2	2	1	1	4	1	2	52	1	20.07	1	1	1	1	1	1	1	1	1	0	2	2	1	0	2	0.29	bronchiectasis, cardiomegali	rice,collards	water,palm sugar
BB58	2	1	1	1	1	1	1	1	40	2	22.89	1	1	1	1	1	1	1	1	0	0	2	2	0	0	1	-0.32	chronic bronchitis	boiled corn	orange extract,water,tea
BB61	2	2	2	1	1	4	1	2	58	1	23.26	1	1	1	1	1	1	1	1	0	0	2	2	1	0	1	-0.01	fibrosis, asthma	rice,chicken,tofu,banana	tea
BB63	2	2	2	1	1	4	1	2	29	1	18.37	1	1	1	1	1	1	1	1	0	0	2	2	1	0	2	0	lung abses, pleura effusion	tempe,tofu	milk
BB64	2	2	2	1	1	4	1	2	28	2	19.88	1	1	1	1	1	1	1	1	0	0	2	1	1	0	1	-0.27	bacterial pneumonia	porridge,greenpeal,coconut milk	water
BB68	2	2	2	1	1	3	1	2	58	1	17.58	1	1	1	1	1	1	2	1	0	0	2	2	1	0	2	0.24	bacterial pneumonia	rice,tempe	tea
BB70	2	2	2	1	1	4	1	2	25	1	25.14	1	1	1	1	1	1	1	1	0	0	2	1	1	0	1	-0.07	chronic bronchitis	rice,papaya leaves,crackers	water
BB71	2	1	1	1	1	1	1	1	63	1	22.04	1	1	1	1	1	1	1	1	5	0	2	1	0	0	2	0.11	bronchiectasis, fibrosis	bread	water
BB72	2	2	2	2	2	3	2	1	24	1	17.33	1	1	1	1	1	1	1	1	1	0	2	2	3	1	1	-0.06	TB	rice,sea fish	milk,ginger,water
BB75	2	1	1	1	1	1	1	2	38	1	18.75	1	1	1	1	1	2	1	1	0	0	2	1	0	0	1	-0.04	chronic bronchitis	rice,sea fish,spinach soup	water
BB76	2	1	2	1	2	4	1	2	67	1	22.48	1	1	1	1	1	1	1	1	0	0	2	1	1	0	1	-0.13	bronchiectasis	porridge,vegetables,tempe	water
BB77	2	2	2	1	1	1	1	2	59	2	22.89	1	1	1	1	1	1	1	1	0	0	2	2	1	0	2	0.35	chronic bronchitis	rice,chicken,chili	soybean milk,water
BB80	2	2	1	1	1	3	1	2	39	1	20.08	1	1	1	1	1	1	1	1	5	5	1	1	1	0	1	-0.04	bronchiectasis	none	water
BB81	1	2	2	1	2	2	2	1	50	2	21.64	1	1	1	1	1	1	1	1	0	0	1	2	3	1	2	0.84	TB smear negative	none	sweetened tea
BB83	2	1	1	1	1	4	1	2	80	1	17.78	1	1	1	2	1	1	1	1	0	0	2	1	0	0	1	-0.85	chronic bronchitis	rice,beef	water
BB84	2	2	1	1	1	3	2	2	71	2	20.57	2	1	1	1	1	1	1	1	0	0	2	2	2	1	2	0.22	TB smear negative	porridge,vegetables, bread	tea with sugar, water
BB85	2	2	1	2	2	2	2	1	33	1	21.56	1	1	1	1	1	1	1	1	0	0	2	2	3	1	1	-0.35	TB	rice, egg, porridge with chicken, green bean porridge	mineral water, milk
BB86	2	2	2	1	1	1	1	2	58	1	20.96	1	1	1	1	1	1	1	1	1	0	2	2	1	0	2	0.01	infected bronchiectasis	bread	milk
BB87	2	2	2	1	1	3	2	2	39	1	20.96	1	1	1	1	1	1	1	1	0	0	2	2	2	1	2	0.07	TB	rice, egg, vegetables	tea with sugar
BB90	2	1	1	1	1	1	1	1	32	2	17.97	1	1	1	1	1	1	1	1	0	0	2	2	0	0	2	0.04	chronic bronchitis	rice, egg	sweet tea, mineral water
BB91	2	1	1	1	1	1	1	1	55	1	36.73	1	1	1	1	1	1	1	1	5	0	2	2	0	0	2	0.01	chronic bronchitis	rice, vegetables	sweet tea, mineral water
BB92	2	2	1	1	1	4	1	2	63	2	16.84	1	1	1	1	1	1	1	1	0	0	2	2	1	0	2	0.05	pneumonia	rice, eggplant	milk, mineral water
BB93	2	2	2	1	1	1	1	2	67	1	23.71	1	1	1	2	1	1	1	1	5	0	2	2	1	0	2	0.43	asthma	gudeg porridge	mineral water
BB94	2	1	1	1	1	4	1	1	59	2	18.73	1	1	1	1	1	1	1	1	0	0	2	2	0	0	2	0.05	bronchiectasis	rice, bean vegetables, tempe	sweet tea
BB95	2	2	2	1	1	4	1	2	66	1	18.43	1	1	1	1	1	1	1	1	0	0	2	2	1	0	2	0.06	bronchiectasis	rice, steamed egg	mineral water
BB96	2	1	1	1	1	1	1	1	58	2	13.78	2	1	1	1	1	1	1	1	0	0	1	2	0	0	1	-0.32	infected bronchiectasis	none	mineral water, sweet tea
BB97	2	1	1	1	1	1	1	1	35	2	21.93	1	1	1	1	1	1	1	1	0	0	2	2	0	0	1	-0.35	chronic bronchitis	rice, egg, bean vegetables	mineral water, sweet tea
BB98	1	2	2	2	2	2	2	1	25	1	16.65	1	1	1	1	1	1	1	1	0	0	2	2	3	1	2	0.13	pulmonary TB and spinal TB	instant noodle, friend banana	mineral water, milk
BB100	2	2	2	1	1	4	1	2	67	2	20.41	1	1	1	2	1	1	1	1	0	0	2	1	1	0	2	0.47	pneumonia	tempe	mineral water
BB101	2	2	1	2	2	3	2	1	56	2	20.31	1	1	1	1	1	1	1	1	0	0	1	1	3	1	2	0.31	TB	none	mineral water
BB102	2	1	1	1	1	4	1	1	32	1	22.06	1	1	1	1	1	1	1	1	0	0	2	2	0	0	1	-0.11	non specific pneumonia	rice, vegetable, egg, oseng	mineral water, sweet tea
BB103	2	1	1	1	1	1	1	1	38	1	28.58	1	1	1	1	1	1	1	1	5	0	2	1	0	0	2	0.18	chronic bronchitis	bread	mineral water
BB104	2	1	1	1	1	1	1	1	34	1	22.31	1	1	1	1	1	1	1	1	4	5	2	2	0	0	1	-0.85	chronic bronchitis	fried tofu	pocari sweat, mizone
BB105	2	2	2	1	1	4	1	2	63	1	18.52	1	1	1	1	1	1	1	1	5	0	2	2	1	0	2	0.43	bronchiectasis	bean porridge	milk, mineral water
BB106	2	2	2	1	1	2	2	2	67	2	20.43	1	1	1	1	1	1	1	1	0	0	2	2	2	1	2	0.01	TB smear negative	rice, tofu, tempe, vegetable, carrot, porridge	mineral water, tea
BB107	2	1	2	1	1	2	1	2	58	1	21.78	1	1	1	1	1	1	1	1	4	0	2	2	1	0	2	0.33	pneumonia	jenang (flour with brown sugar sauce)	sweet tea
BB109	2	1	1	1	1	1	1	1	37	1	21.22	1	1	1	1	1	1	1	1	5	0	2	1	0	0	2	0.11	chronic bronchitis	rice, vegetables	mineral water
BB110	2	2	2	1	1	1	1	2	32	2	18.83	1	1	1	1	1	1	1	1	0	0	2	2	1	0	2	0.05	chronic bronchitis	rice and soup	mineral water, milk
BB111	2	2	2	2	2	2	2	1	41	1	24.49	2	1	1	1	1	1	1	1	1	0	2	2	3	1	1	-0.73	TB	rice and meat soup	hot tea
BB112	2	2	2	1	1	4	1	2	51	1	22.41	1	1	1	1	1	1	1	1	0	0	2	2	1	0	1	-0.25	pneumonia	porridge, tofu, meat soup	tea, mineral water with brown sugar
BB113	2	2	2	2	2	2	2	1	37	1	22.77	2	1	1	1	1	1	1	1	4	0	1	2	3	1	2	0.11	TB	none	tea
BB114	2	1	1	1	1	4	1	1	58	1	17.21	1	1	1	1	1	1	1	1	1	0	2	2	0	0	1	-0.19	chronic bronchitis	rice, banana	coffee, mineral water, tea, honey
BB115	2	2	2	1	1	2	2	2	46	2	11.89	1	1	1	2	1	1	1	1	0	0	2	2	2	1	2	0.25	TB smear negative	rice, noodles	mineral water, sweettea
BB116	2	2	1	1	1	1	1	2	50	2	23.28	1	1	1	1	1	1	1	1	0	0	2	1	1	0	2	0.36	chronic bronchitis	rice, vegetables	mineral water
D01	2	2	2	2	2	2	2	1	34	1	23.37	1	1	1	1	1	1	1	1	4	0	2	2	3	1	2	0.74	TB	bread,rice,chicken liver,chicken,beans	tea without sugar, water
D03	2	2	2	1	1	2	1	2	60	1	17.3	1	1	2	1	1	1	1	1	0	0	2	1	1	0	2	0.74	COPD	rice,beef	water
D04	2	2	2	2	2	2	2	1	49	1	17.9	1	1	1	1	1	2	1	1	4	5	2	1	3	1	2	0.55	TB	greenpeal,rice,vegetables,tempe	water
D05	2	2	2	2	2	2	2	1	43	2	27.89	1	1	1	1	1	2	2	1	0	0	1	1	3	1	2	0.9	TB	none	water
D06	2	2	2	2	2	2	2	1	20	1	19	1	1	1	1	1	2	1	1	0	0	2	2	3	1	2	0.83	TB	biscuit,rice,tempe,egg,tofu,banana	water,tea without sugar
D07	2	2	2	2	2	2	2	1	57	1	23.67	2	1	1	1	1	2	1	1	0	0	2	2	3	1	2	0.77	TB	rice,spinach	sweetened tea,water
D08	2	2	2	2	2	2	2	1	45	2	18.07	1	1	1	1	1	1	1	1	0	0	2	2	3	1	2	0.68	TB	rice,tempe	milk,water
D09	2	2	2	2	3	2	2	2	47	2	19.48	1	1	1	1	1	1	1	1	0	0	2	2	2	1	1	-0.07	TB	rice,tofu,tempe,coconut milk,egg	sweetened tea,water
D11	2	2	2	2	2	2	2	1	50	1	23.6	1	1	1	1	1	2	1	1	4	0	2	2	3	1	2	0.9	TB	rice,egg	sweetened tea,water
D14	2	2	2	2	2	2	2	1	36	2	17.33	1	1	1	1	1	1	1	1	0	0	2	2	3	1	2	0.87	TB	rice,fried chicken	water,milk
D15	2	2	2	2	2	2	2	1	36	2	20.81	1	1	1	1	1	1	1	1	0	0	2	1	3	1	2	0.98	TB	rice,tomato,peanut	water
D18	2	1	2	1	3	2	1	2	36	2	22.89	1	1	1	1	1	1	1	1	0	0	2	2	1	0	2	0.1	chronic bronchitis	rice,collards,fried flour,carrot,sprouts	sweetened tea
D19	2	2	2	2	2	2	2	1	23	1	21.85	1	1	1	1	1	1	1	1	0	0	2	1	3	1	2	0.84	TB	rice,fried chicken	water
D20	2	2	2	2	2	2	2	1	38	1	16.33	1	1	1	1	1	1	1	1	4	5	2	1	3	1	2	0.72	TB	rice,tofu,tempe,fried noodle	water
D21	2	1	2	2	2	2	2	1	26	2	20.57	1	1	1	1	1	1	1	1	0	0	1	1	3	1	2	0.9	TB	none	water
D25	2	1	2	2	2	2	2	1	40	1	16.55	1	1	1	1	1	1	1	1	0	0	1	1	3	1	2	0.86	TB	none	water
D26	2	2	2	2	2	3	2	1	59	2	18	1	1	1	1	1	1	1	1	0	0	1	1	3	1	2	0.84	TB	none	water
DD02	2	2	2	1	1	1	1	2	27	2	22.41	1	1	1	1	2	2	1	1	0	0	1	1	1	0	1	-0.79	chronic bronchitis	none	water
DD03	2	1	1	1	1	1	1	1	49	1	23.51	1	1	1	1	1	1	1	1	0	0	2	2	0	0	1	-1	chronic bronchitis	rice,tofu,meat	milk, water
DD04	2	1	1	1	2	2	2	2	54	1	19.83	1	1	1	1	1	1	1	1	0	0	2	2	2	1	2	0.4	TB	rice,jackfruit,tempe,chicken,	sweetened tea,water
DD05	2	2	1	2	2	2	2	1	41	1	23.6	1	1	1	1	1	1	1	1	0	0	2	2	3	1	2	0.67	TB	tempe,rice,fish	sweetened tea
DD06	2	1	1	1	1	3	1	2	55	1	26.89	1	1	2	1	1	1	1	1	5	0	2	2	1	0	2	0.21	bronchiectasis	rice,vegetables,tempe,crackers	sweetened tea,water
DD07	2	1	1	1	1	1	1	1	61	1	16.65	1	1	2	1	1	1	1	1	4	0	2	2	0	0	2	0.9	chronic bronchitis	rice,egg	sweetened tea
DD08	2	1	1	1	1	1	1	1	55	1	21.97	1	1	1	1	1	1	1	1	4	0	2	2	0	0	1	-0.29	chronic bronchitis	noodle	sweetened tea
DD09	2	1	1	1	1	4	1	1	25	2	20.81	1	1	1	1	1	1	1	1	0	0	1	1	0	0	2	0.77	chronic bronchitis	none	none
DD10	2	2	2	1	1	1	1	2	59	1	20.03	1	1	1	1	1	1	1	1	0	0	2	2	1	0	2	0.02	chronic bronchitis	porridge,cassava	sweetened tea
DD12	2	2	1	1	1	2	1	2	31	2	15.63	1	1	1	1	1	1	1	1	0	0	2	2	1	0	1	-0.42	bacterial pneumonia	bread	sweetened tea, water
DD23	2	2	2	1	1	2	1	2	30	1	22.65	1	2	1	1	1	1	1	1	0	5	2	2	1	0	2	0.15	bacterial pneumonia	rice,chicken,banana	sweetened tea, water
DD24	2	1	1	1	1	1	1	1	54	2	23.75	1	1	1	1	1	1	1	1	0	0	2	2	0	0	1	-0.02	chronic bronchitis	bread	sweetened tea
DD26	2	1	1	1	1	4	1	2	51	2	11.87	1	1	1	1	1	1	1	1	0	0	2	2	0	0	2	0.12	lung fibrosis	rice,eggplant,tofu,banana	milk,water
DD27	2	2	1	1	1	4	1	2	58	2	18.22	1	1	1	1	1	1	1	1	0	0	1	1	1	0	2	0.19	bacterial pneumonia	none	water
DD28	2	1	1	1	1	4	1	2	29	2	25.72	1	1	1	1	1	1	1	1	0	0	2	1	1	0	2	0.07	chronic bronchitis	rice,soup,chicken,bread,banana	water
DD29	2	2	1	2	2	2	2	1	37	2	17.78	1	1	1	1	1	1	1	1	0	0	2	2	3	1	2	0.77	TB	rice,carrot	sweetened tea
DD30	2	1	1	1	1	4	1	1	24	1	18.82	1	1	1	1	1	2	1	1	4	2	2	1	0	0	2	0.36	chronic bronchitis	rice,bamboo sprout,tempe	water
DD32	2	1	1	1	2	4	2	2	41	2	16.23	1	1	1	1	1	1	1	1	0	0	2	2	2	1	2	0.1	TB	rice,chicken nugget	sweetened tea
DD33	2	1	1	1	1	1	1	2	25	1	23.42	1	1	1	1	1	1	1	1	5	4	1	2	1	0	1	-0.26	chronic bronchitis	none	tea
DD34	2	2	1	2	2	2	2	1	23	1	16.65	1	1	1	1	1	1	1	1	0	4	2	1	3	1	2	0.77	TB	biscuit	water
DD35	2	2	2	1	1	1	1	2	30	1	21.09	1	1	1	1	1	1	1	1	0	0	2	2	1	0	2	0.39	chronic bronchitis ec. alergy	rice,fried egg	water,orange juice
DD37	2	2	1	1	1	3	1	2	46	1	24.24	1	1	1	1	1	1	1	1	5	0	2	2	1	0	2	0.36	bacterial pneumonia	rice,fish	water,boiled ginger water
DD38	2	2	1	1	1	4	1	2	60	1	14.49	1	1	1	1	1	2	1	1	5	0	2	2	1	0	2	0.28	infected bronchiectasis	porridge,vegetables	milk,water
DD39	2	2	1	2	2	2	2	1	27	1	19.26	1	1	1	1	1	1	1	1	1	5	1	2	3	1	1	-0.37	TB	none	ginger milk, water
DD40	2	2	2	2	2	2	2	1	48	1	20.7	1	1	1	1	1	1	1	1	5	0	2	1	3	1	2	0.75	TB	rice,beef rendang,vegetables	water
DD41	2	1	1	1	2	1	1	2	31	1	20.37	1	1	1	1	1	1	1	1	0	0	2	2	1	0	2	0.35	chronic bronchitis	bread	sweetened tea
DD42	2	1	1	1	1	1	1	1	39	2	20.03	1	1	1	1	1	1	1	1	0	0	2	1	0	0	1	-0.32	chronic bronchitis	rice,noodle,egg	water
DD43	2	2	2	1	1	4	1	2	46	1	21.64	1	1	1	1	1	2	1	1	4	5	2	1	1	0	1	-0.1	pleural effusion	porridge,egg	water
DD46	2	2	1	2	2	2	2	1	45	2	21.62	1	1	1	1	1	1	1	1	0	0	2	2	3	1	2	0.74	TB	porridge,tofu,banana	sweetened tea
DD47	2	1	1	1	1	4	1	1	39	1	21.09	1	1	1	1	1	1	1	1	4	0	2	2	0	0	2	0	pneumonia	porridge,tofu,bread	milk,water
DD48	2	2	2	1	1	3	1	2	50	2	15.15	1	1	1	1	1	1	1	1	0	0	2	1	1	0	2	0.16	pneumonia	rice,spinach,tofu,tempe	water
DD50	2	1	2	2	2	2	2	1	46	1	19.53	1	1	1	1	1	1	1	1	4	5	2	2	3	1	2	1	TB	porridge, chicken, tempe	sweetened tea
DD51	2	1	2	2	2	2	2	1	23	1	23.88	1	1	1	1	1	1	1	1	5	5	2	2	3	1	2	0.9	TB	rice,papaya leaves,egg	sweetened tea,energy drink
DD52	2	2	1	1	1	1	1	2	19	1	18.91	1	1	1	1	1	1	1	1	4	0	2	1	1	0	2	0.06	chronic bronchitis	rice,veg soup, tempe	water
DD53	2	2	1	1	1	4	1	2	41	2	16.33	1	1	1	1	1	1	1	1	0	0	2	1	1	0	2	0.45	chronic bronchitis	porridge,chicken	water
DD54	2	2	2	2	2	2	2	1	32	1	22.72	1	1	1	1	1	1	1	1	4	4	2	2	3	1	2	0.72	TB	porridge,egg,tofu,crackers	water, sweetened tea
DD55	2	2	2	2	2	2	2	1	34	1	16.37	1	1	1	1	1	1	1	1	4	5	2	1	3	1	2	0.77	TB	rice,vegetables,egg	water
DD61	2	1	1	1	1	1	1	1	26	2	20.54	1	1	1	1	1	1	1	1	0	0	2	1	0	0	2	0.02	chronic bronchitis	rice,chicken,banana	water
DD63	2	2	1	1	1	4	1	2	49	2	16.88	1	1	1	1	1	1	1	1	0	0	2	1	1	0	2	0.18	chronic bronchitis	rice,stir-fry vegetables	water
DD65	2	2	2	1	1	1	1	2	72	2	19.72	2	1	1	1	1	1	1	1	0	0	2	1	1	0	1	-0.02	pneumonia	rice,soto,boiled tempe	water
DD66	2	2	2	1	2	2	2	2	35	1	19.15	1	1	1	1	1	1	1	1	0	0	2	1	2	1	1	-0.26	TB	porridge,tofu,banana	water
DD67	2	2	2	2	2	2	2	1	21	1	23.63	1	1	1	1	1	1	1	1	4	0	2	1	3	1	2	0.74	TB	cookies	none
DD68	2	2	2	2	1	2	2	2	36	1	24.97	1	1	1	1	1	1	1	1	0	0	2	1	2	1	2	0.47	TB	bread	water
DD69	2	2	2	1	1	1	1	2	26	2	18.03	1	1	1	1	1	1	1	1	0	0	2	2	1	0	1	-0.63	chronic bronchitis	rice, egg	water, milk
DD70	2	2	2	1	1	3	2	2	36	2	19.3	1	1	1	1	1	1	1	1	0	0	2	2	2	1	1	-0.13	TB	fried rice, prawn crackers	sweetened tea
DD71	2	2	2	2	2	2	2	1	19	2	17.5	1	1	1	1	1	1	1	1	0	0	1	1	3	1	2	0.95	TB	none	water
DD72	2	1	1	2	3	2	2	2	40	1	16.48	1	1	1	1	1	1	1	1	0	0	2	2	2	1	1	-0.24	TB	porridge	sweetened tea
DD73	1	2	1	1	1	1	1	1	51	1	19.02	1	1	1	1	1	1	1	1	1	0	1	1	0	0	2	0.84	pneumonia	none	water
DD74	2	2	2	1	1	1	1	2	57	1	21.3	1	1	1	1	1	1	1	1	4	0	2	2	1	0	2	0.34	chronic bronchitis	rice, sour vegetables, cassava, kikil	mineral water, sekoteng (javanese drink with ginger)
DD76	2	1	2	2	2	2	2	1	43	1	17.92	1	1	1	1	1	1	1	1	4	5	2	2	3	1	2	0.9	TB	stir rice, banana	plain tea
DD77	2	2	2	1	1	4	1	2	66	2	17.12	1	1	1	1	1	1	1	1	0	0	2	1	1	0	2	0.25	pneumonia	rice,vegetables	mineral water
DD78	2	2	1	2	3	2	2	2	38	1	20.07	1	1	1	1	1	1	1	1	3	0	2	2	2	1	2	0.42	TB	porridge, vegetables	sweet tea, mineral water
DD79	2	2	1	1	1	2	2	2	32	1	21.71	1	1	1	1	1	1	1	1	4	0	1	1	2	1	2	0.16	TB smear negative	none	mineral water
DD80	2	2	1	2	2	2	2	1	54	1	14.88	1	1	1	1	1	1	1	1	3	0	2	2	3	1	2	0.7	TB	rice, tofu, kare (vegetable)	sweet tea, mineral water
DD81	2	2	2	1	1	2	1	2	45	1	20.06	1	1	1	1	1	1	1	1	4	0	2	2	1	0	2	0.5	pleural effusion	rice, long bean	sweet tea
DD82	2	2	2	1	1	2	2	2	28	2	18.36	1	1	1	1	1	1	1	1	0	0	2	1	2	1	2	0.62	TB smear negative	porridge, tempe	mineral water
DD84	2	2	1	1	1	1	1	2	52	1	19.05	1	1	1	1	1	1	1	1	0	0	2	2	1	0	2	0.93	chronic bronchitis	porridge	mineral water, sweet tea
DD85	2	1	1	1	1	1	1	2	39	2	17.48	1	1	1	1	1	1	1	1	0	0	2	1	0	0	2	0.04	chronic bronchitis	fried rice, fried egg	mineral water
DD86	2	1	2	2	2	2	2	1	60	2	16.89	1	1	1	1	1	1	1	1	0	0	2	1	3	1	2	0.77	TB	rice, tofu	mineral water
DD87	2	2	1	2	2	2	2	1	38	1	15.82	1	1	1	1	1	1	1	1	0	0	2	2	3	1	2	0.77	TB	rice, gudeg, tofu	mineral water, sweet tea
DD88	2	2	1	2	2	2	2	1	36	1	18.22	1	1	1	1	1	1	1	1	1	4	2	2	3	1	2	0.86	TB	rice, fried egg	sweet tea
DD89	2	2	2	1	1	4	1	2	60	2	16.02	1	1	1	1	1	1	1	1	0	0	2	1	1	0	1	-0.13	policystic lung disease	porridge, steamed egg, tofu, and vegetables, banana	mineral water
DD90	2	1	1	1	1	3	1	2	29	2	24.44	1	1	1	1	1	1	1	1	0	0	2	2	1	0	1	-0.61	chronic bronchitis	bread, sweet potato crackers	sweet tea, mineral water
DD91	2	2	2	1	1	3	2	2	30	1	14.69	1	2	1	1	1	1	1	1	4	5	2	2	2	1	1	-0.18	TB smear negative	rice, fried egg	sweet tea, mineral water
DD92	2	2	2	1	1	4	1	2	52	1	19.03	1	1	1	1	1	1	1	1	0	0	2	1	1	0	1	-0.17	bronchiectasis	steamed bean	none
DD93	2	2	2	2	2	2	2	1	52	1	16.45	1	2	1	1	1	1	1	1	4	0	2	1	3	1	2	0.75	TB	letok porridge	mineral water
DD94	2	2	2	2	2	2	2	1	53	2	16.67	1	1	1	1	1	1	1	1	0	0	2	2	3	1	2	0.85	TB	bread	tea
DD95	2	2	2	1	1	3	2	2	56	1	14.42	1	1	1	1	1	1	1	1	5	5	2	2	2	1	1	-0.3	TB smear negative	bread,rice, tofu	mineral water, sweet tea
DD96	2	2	2	1	1	4	1	2	63	2	19.22	1	1	1	1	1	1	1	1	0	0	2	2	1	0	2	0.3	Pneumonia, Hipertensive heart disease	porridge	mineral water,milk
DD98	2	2	1	2	2	2	2	1	69	1	13.98	1	1	1	1	1	1	1	1	3	0	2	1	3	1	2	0.84	TB	potato	mineral water
DD99	2	2	2	2	3	2	2	2	65	2	11.33	1	1	1	1	1	1	1	1	0	0	2	2	2	1	2	0.2	TB	rice, stir kangkung (vegetables), tempe	mineral water, sweet tea
DD100	2	2	1	1	1	1	1	2	54	1	18.82	1	1	1	1	1	1	1	1	3	0	2	2	1	0	1	-0.6	chronic bronchitis	porridge, tofu vegetables, gudangan	mineral water, milk
DD101	2	2	2	2	2	2	2	1	42	1	19.47	1	1	1	1	1	1	1	1	4	4	2	1	3	1	2	0.74	TB	porridge, tofu vegetables	mineral water
DD103	2	2	1	1	2	3	2	2	24	2	16.89	1	1	1	1	1	1	1	1	0	0	2	1	2	1	2	0.24	TB	bread, milk	mineral water
DD104	2	2	1	2	2	2	2	1	21	1	14.57	1	1	1	1	1	1	1	1	4	4	2	2	3	1	2	0.98	TB	rice, fried egg	sweet tea, mineral water, pocari sweat
DD105	2	2	2	1	1	3	2	2	20	1	19.92	1	2	1	1	1	1	1	1	3	4	2	1	2	1	2	0.36	TB	bread	mineral water
DD106	2	2	1	1	1	4	1	2	60	1	18.03	1	1	1	1	1	1	1	1	5	0	2	2	1	0	1	-0.02	bacterial pneumonia	fried rice	water, tea without sugar
DD107	2	2	1	1	1	4	1	2	47	2	17.78	1	1	1	1	1	1	1	1	0	0	2	2	1	0	2	0.25	bronchiectasis	porridge	sweet tea, water
DD108	2	1	1	2	3	2	2	2	29	2	16.94	1	1	1	1	1	1	1	1	0	0	2	1	2	1	2	0.28	TB	egg, rice	water
E01	2	2	2	2	2	2	2	1	50	1	17.99	1	1	1	1	1	2	1	1	5	0	2	2	3	1	2	0.84	TB	soup	sweet tea,water
E02	2	2	2	2	2	2	2	1	59	2	16.2	2	1	1	1	1	1	1	1	0	0	2	1	3	1	2	0.74	TB	banana	water
E03	2	2	2	2	2	2	2	1	53	1	15.63	1	1	1	1	1	1	1	1	0	0	2	1	3	1	2	0.55	TB	fried rice	water
E05	2	2	2	2	2	2	2	1	63	1	19.36	2	1	1	1	1	1	1	1	5	5	2	1	3	1	1	-0.01	TB	fried noodle, egg	water
E06	2	2	2	2	2	2	2	1	62	1	16.9	1	1	1	1	1	1	1	1	5	5	2	2	3	1	1	-0.2	TB	soto (vegetables, rice, chicken,curcuma)	milk,water
A10	1	1	1	1	3	1	1	1	27	2	21.23	1	1	1	1	1	1	1	1	0	0	1	1	0	0	2	0.65	healthy control	none	water
A14	1	1	1	1	1	1	1	1	20	1	17.51	1	1	1	1	1	1	1	1	0	0	1	1	0	0	2	0.9	healthy control	none	water
A15	1	1	1	0	0	1	1	1	29	2	19.92	1	1	1	1	1	1	1	1	0	0	1	1	0	0	2	0.82	healthy control	none	water
B02	1	1	1	1	1	1	1	1	47	1	20.58	1	1	1	1	2	1	1	2	1	0	2	2	0	0	1	-0.09	healthy control	rice,tofu,cabbage,bread	sweetened tea
B06	1	1	1	1	0	1	1	1	45	2	28.04	2	1	1	1	1	1	1	1	0	0	2	2	0	0	2	0.61	healthy control	rice,vegetables,tempe	sweetened tea,water
D10	1	1	1	0	0	1	1	1	41	2	18.73	1	1	1	1	2	1	1	1	0	0	2	2	0	0	1	-0.12	healthy control	rice,papaya leaves,tofu,tempe	sweetened tea
D13	1	1	1	1	1	1	1	1	21	1	19.03	1	1	1	1	1	1	1	1	0	0	1	1	0	0	1	-0.96	healthy control	none	water
D16	1	1	1	1	3	1	1	1	37	1	30.1	1	1	1	1	1	1	1	1	0	0	2	2	0	0	1	-0.53	healthy control	pizza	water,coffee
D17	1	1	1	1	1	1	1	1	30	1	23.03	1	1	1	1	1	1	1	1	0	0	2	2	0	0	2	0.7	healthy control	rice,fish sarden	water,coffee
E08	1	1	1	0	1	0	1	1	30	1	32.87	1	0	1	1	1	1	1	1	5	5	2	2	0	0	1	-0.2	healthy control	fish, rice	sweetened tea, water
E09	1	1	1	0	1	0	1	1	49	1	31.22	1	0	1	1	2	1	1	1	3	0	2	2	0	0	2	0.11	healthy control	porridge	tea, coffee, water
E10	1	1	1	0	0	0	1	1	54	2	25.89	1	0	1	1	1	1	1	1	3	4	2	2	0	0	1	-0.54	healthy control	fried rice	sweet tea
E11	1	1	1	0	0	0	1	1	28	2	23.05	1	0	1	1	1	1	1	1	0	0	2	1	0	0	1	-0.32	healthy control	tempe, tofu	mineral water
E12	1	1	1	0	0	0	1	1	60	1	23.05	1	0	1	1	1	1	1	1	3	0	2	2	0	0	1	-0.35	healthy control	soup	sweet tea, mineral water
E13	1	1	1	0	0	0	1	1	24	2	19.5	1	0	1	1	1	1	1	1	4	5	2	2	0	0	1	-0.57	healthy control	soto (vegetables, rice, chicken,curcuma)	sweet tea, mineral water
E14	1	1	1	0	0	0	1	1	63	1	19.47	1	0	1	1	2	1	1	1	0	0	2	1	0	0	1	-0.46	healthy control	rice, egg, vegetables	none
E15	1	1	1	0	0	0	1	1	43	1	24.84	1	0	1	1	1	1	1	1	4	0	2	1	0	0	1	-0.57	healthy control	porridge, chicken, tempe	mineral water
E16	1	1	1	0	0	0	1	1	25	2	22.21	1	0	1	1	1	1	1	1	3	0	2	2	0	0	1	-0.53	healthy control	tempe, rice	tea
E17	1	1	1	0	0	0	1	1	54	2	21.63	1	0	1	1	1	1	1	1	5	5	2	2	0	0	2	0.74	healthy control	noodle, egg	mineral water, sweet tea
E18	1	1	1	0	0	0	1	1	66	1	23.66	1	0	1	1	1	1	1	1	0	0	2	2	0	0	2	0.11	healthy control	porridge	mineral water,milk
E19	1	1	1	0	0	0	1	1	37	1	25.97	1	0	1	1	2	1	1	1	0	3	2	2	0	0	2	0.01	healthy control	vegetables soup, rice	mineral water, milk
E20	1	1	1	0	0	0	1	1	53	2	32.89	1	0	1	1	1	1	1	1	5	0	2	1	0	0	1	-0.36	healthy control	fried noodle, egg	mineral water
E21	1	1	1	0	0	0	1	1	54	1	17.24	1	0	1	1	1	1	1	1	0	0	2	2	0	0	1	-0.32	healthy control	porridge, tempe	mineral water, sweet tea
E22	1	1	1	0	0	0	1	1	30	2	26.9	1	0	1	1	1	1	1	1	0	0	2	2	0	0	1	-0.35	healthy control	banana	mineral water, milk
E23	1	1	1	0	0	0	1	1	52	1	22.49	1	0	1	1	1	1	1	1	5	4	2	1	0	0	1	-0.44	healthy control	rice, beans, tempe	mineral water
E24	1	1	1	0	0	0	1	1	54	1	25.71	1	0	1	1	2	1	1	1	5	0	2	1	0	0	1	-0.54	healthy control	rice, papaya leaves	mineral water
E25	1	1	1	0	0	0	1	1	18	1	23.04	1	0	1	1	1	1	1	1	0	4	2	2	0	0	2	0.03	healthy control	rice, beef, vegetables	sweet tea, mineral water, pocari sweat
E26	1	1	1	0	0	0	1	1	32	2	30.13	1	0	1	1	1	1	1	1	0	4	2	1	0	0	1	-0.53	healthy control	banana	mineral water
E27	1	1	1	0	0	0	1	1	46	1	27.55	1	0	1	1	1	1	1	1	0	0	2	2	0	0	1	-0.2	healthy control	bread	water, tea without sugar
E28	1	1	1	0	0	0	1	1	25	1	24.24	1	0	1	1	1	1	1	1	1	0	2	2	0	0	1	-0.67	healthy control	porridge, egg, kangkung (vegetables)	sweet tea, water
E29	1	1	1	0	0	0	1	1	32	2	20.54	1	0	1	1	2	1	1	1	0	0	2	1	0	0	2	0.01	healthy control	vegetables soup (carrot, beans, cauliflower), egg, rice	water
E30	1	1	1	0	0	0	1	1	28	1	22.86	1	0	1	1	1	1	1	1	0	0	2	2	0	0	1	-0.67	healthy control	bread	sweet tea,water
E31	1	1	1	0	0	0	1	1	54	2	29.59	1	0	1	1	1	1	1	1	0	0	2	1	0	0	1	-0.32	healthy control	banana, cakes	water
E32	1	1	1	0	0	0	1	1	28	1	24.45	1	0	1	1	1	1	1	1	0	0	2	1	0	0	1	-0.35	healthy control	fried rice, tempe	water
E33	1	1	1	0	0	0	1	1	23	1	24.86	1	0	1	1	1	1	1	1	0	5	2	1	0	0	1	-0.04	healthy control	rice, tofu	water
E34	1	1	1	0	0	0	1	1	51	1	21.94	1	0	1	1	1	1	1	1	5	5	2	2	0	0	1	-0.79	healthy control	rice,spinach, chili, tempe	milk,water
E35	1	1	1	0	0	0	1	1	34	2	25.71	1	0	1	1	1	1	1	1	3	0	1	1	0	0	1	-0.99	healthy control	none	water
E36	1	1	1	0	0	0	1	1	36	1	27.68	1	0	1	1	1	1	1	1	0	0	1	1	0	0	2	0.11	healthy control	none	water
E37	1	1	1	0	0	0	1	1	34	1	25.35	1	0	1	1	1	1	1	1	1	0	1	1	0	0	1	-0.2	healthy control	none	water
E38	1	1	1	0	0	0	1	1	30	2	22.66	1	0	1	1	1	1	1	1	0	0	2	2	0	0	2	0.11	healthy control	rice, salted egg	sweetened tea
EXCLUDED	REASON FOR EXCLUSION
BB30	extrapulmonal TB
BB03	contaminated culture
AA10	incomplete data
AA23	incomplete data
AA35	incomplete data
EE03	incomplete data
EE04	incomplete data
EE05	incomplete data
EE06	incomplete data
EE07	incomplete data
EE08	incomplete data
AA53	lost to follow up
AA90	lost to follow up
B04	lost to follow up
BB24	lost to follow up
BB43	lost to follow up
D02	lost to follow up
DD01	lost to follow up
DD97	lost to follow up
EE01	lost to follow up
EE02	lost to follow up
AA05	history of previous TB
AA09	history of previous TB
AA16	history of previous TB
AA18	history of previous TB
AA25	history of previous TB
AA40	history of previous TB
AA65	history of previous TB
AA78	history of previous TB
AA88	history of previous TB
BB04	history of previous TB
BB15	history of previous TB
BB79	history of previous TB
BB82	history of previous TB
DD83	history of previous TB
AA75	invalid breath measurement
AA100	invalid breath measurement
AA102	invalid breath measurement
AA110	invalid breath measurement
AA117	invalid breath measurement
AA127	invalid breath measurement
BB07	invalid breath measurement
BB09	invalid breath measurement
BB39	invalid breath measurement
BB88	invalid breath measurement
BB89	invalid breath measurement
BB99	invalid breath measurement
BB117	invalid breath measurement
DD13	invalid breath measurement
DD15	invalid breath measurement
DD16	invalid breath measurement
DD17	invalid breath measurement
DD18	invalid breath measurement
DD19	invalid breath measurement
DD20	invalid breath measurement
DD21	invalid breath measurement
DD22	invalid breath measurement
DD45	invalid breath measurement
DD49	invalid breath measurement
DD57	invalid breath measurement
DD58	invalid breath measurement
DD59	invalid breath measurement
DD60	invalid breath measurement
DD62	invalid breath measurement
DD64	invalid breath measurement
DD82	invalid breath measurement
DD95	invalid breath measurement
DD96	invalid breath measurement
BB50	cancer
BB108	cancer
AA130	cancer
AA131	cancer
DD56	cancer
